# Supplementary material for: Dual-phase Ce0.8Sm0.2O2−δ–La0.8Ca0.2Al0.3Fe0.7O3−δ oxygen permeation hollow fiber membrane for oxy-CO2 reforming of methane
Source: Royal Society of Chemistry journal article supplement (doi:10.1039/d3cy01082a), 2024-01-01
Supplement: d3cy01082a1.pdf [file d3cy01082a1.pdf]

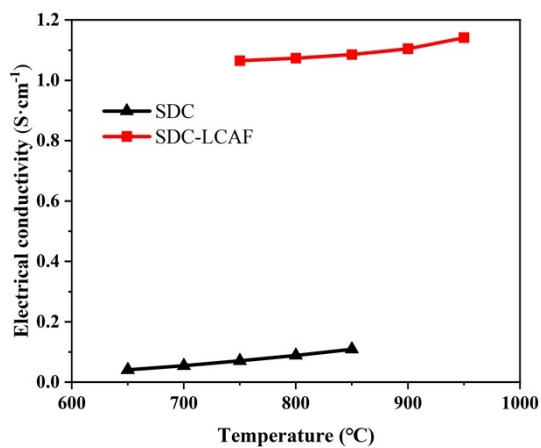

Fig. S1 Electrical conductivity of SDC and SDC-LCAF membrane materials in air atmosphere as a function of temperature.

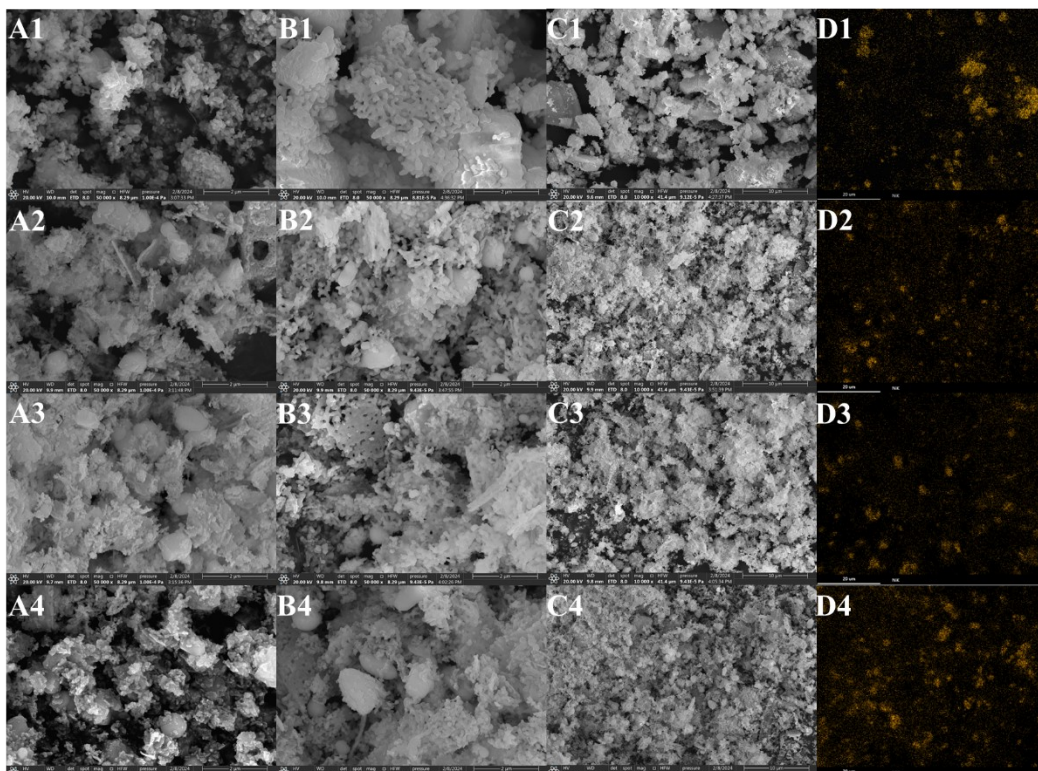

Fig. S2 (A-C) Morphology of NiO/SDC-LCAF catalyst with different Ni content before and after hydrogen reduction, (D) Ni distribution patterns of Fig. C (A, before reduction; B and C after reduction. 1, 10 wt.%; 2, 20 wt.%; 3, 30 wt.%; 4, 40 wt.%).

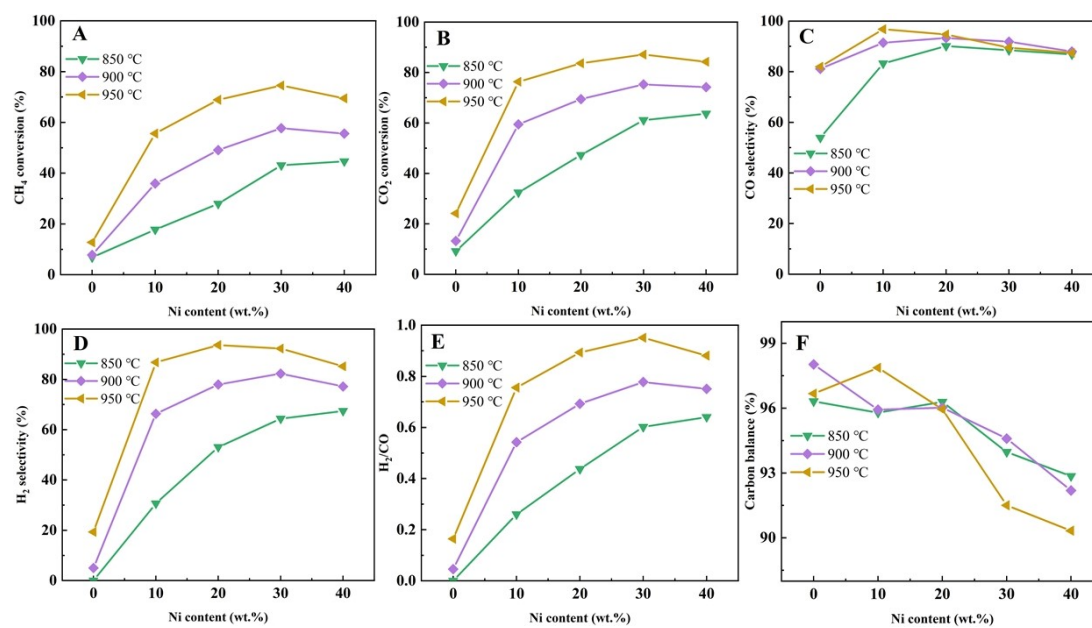

Fig. S3 DRM catalytic performance of catalysts with different Ni contents: (A) CH<sub>4</sub> and (B) CO<sub>2</sub> conversion, (C) CO and (D) H<sub>2</sub> selectivity, (E) H<sub>2</sub>/CO molar ratio, and (F) carbon balance (feed gas was 50 mL min<sup>-1</sup> CH<sub>4</sub> and 50 mL min<sup>-1</sup> CO<sub>2</sub>).

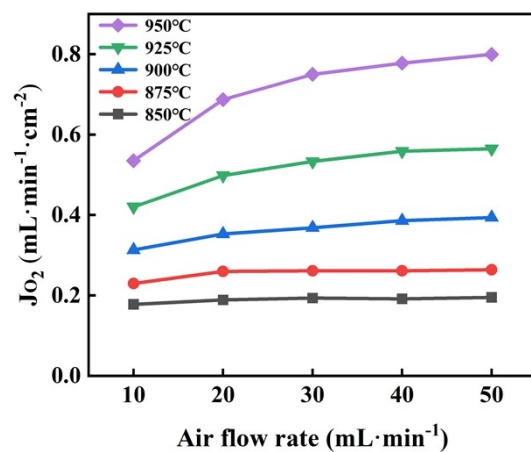

Fig. S4 Oxygen permeation fluxes of SDC-LCAF hollow fiber membrane at different air feed flow rates (900 °C, He sweep flow rate was 100  $\text{mL} \cdot \text{min}^{-1}$ ).

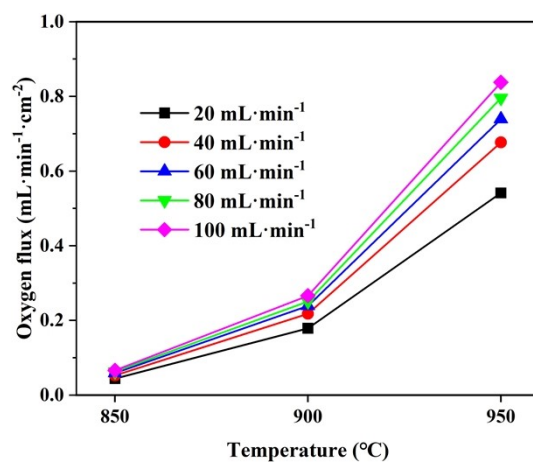

Fig. S5 Effect of He sweep flow rate on oxygen flux of LCAF-SDC hollow fiber membrane as a function of temperature (Air feed flow rate was 100 mL min<sup>-1</sup>).

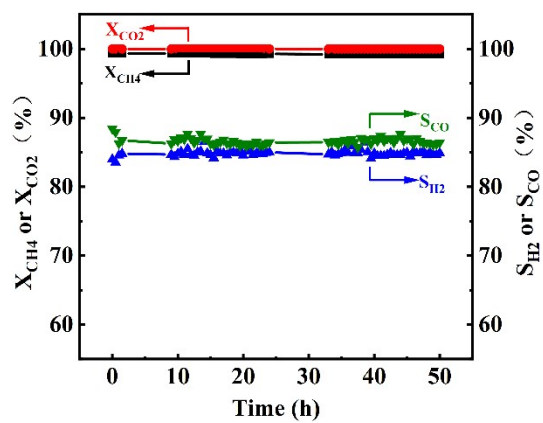

Fig. S6 DRM stability of SDC-LCAF HFM reactor at 900 °C (flow rate of CH<sub>4</sub>-CO<sub>2</sub>-He was 10-10-20 mL min<sup>-1</sup>, respectively).

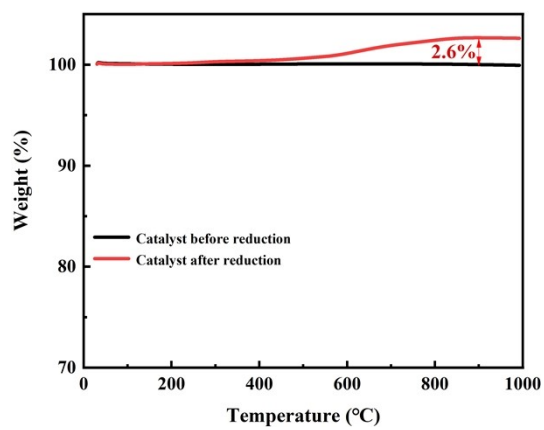

Fig. S7 TGA curves of catalysts before and after reduction.

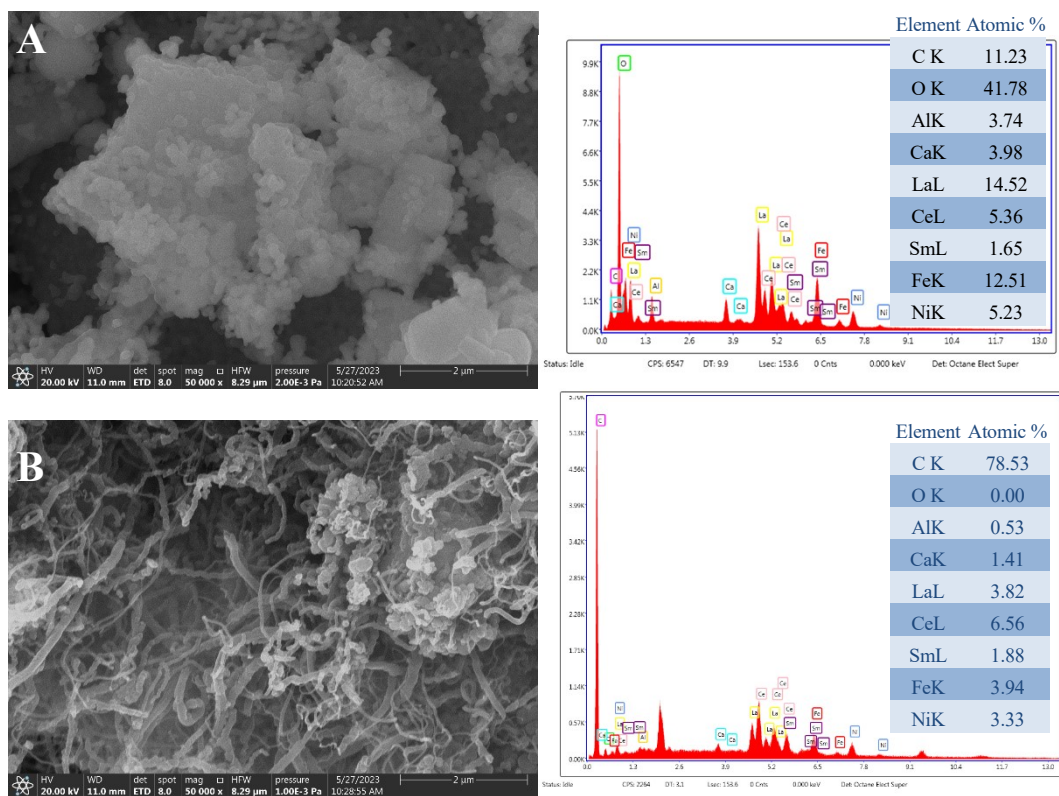

Fig. S8 EDS mapping of spent catalysts after (A) OCRM and (B) DRM.
