# Supplementary material for: Dual-phase Ce0.8Sm0.2O2−δ–La0.8Ca0.2Al0.3Fe0.7O3−δ oxygen permeation hollow fiber membrane for oxy-CO2 reforming of methane
Source: Royal Society of Chemistry journal article supplement (doi:10.1039/d3cy01082a), 2024-01-01
Supplement: d3cy01082a2.pdf [file d3cy01082a2.pdf]

## Supporting information

### **Dual-phase $\text{Ce}_{0.8}\text{Sm}_{0.2}\text{O}_{2-\delta}\text{-La}_{0.8}\text{Ca}_{0.2}\text{Al}_{0.3}\text{Fe}_{0.7}\text{O}_{3-\delta}$ oxygen permeation hollow fiber membrane for oxy- $\text{CO}_2$ reforming of methane**

*Yuepeng Hei<sup>1</sup>, Shuang Wu<sup>1</sup>, Zuojun Lu<sup>1</sup>, Xiuxia Meng<sup>1</sup>, Jian Song<sup>1,\*</sup>, Naitao Yang<sup>1</sup>, Bo Meng<sup>1</sup>, Claudia Li<sup>3</sup>, Jaka Sunarso<sup>4</sup>, Sibudjing Kawi<sup>3</sup>, Xiaoyao Tan<sup>2</sup>, Shaomin Liu<sup>2,\*</sup>*

<sup>1</sup> Department of Chemical Engineering, Shandong University of Technology, Zibo 255049, China

<sup>2</sup> State Key Laboratory of Separation Membranes and Membrane Processes, Department of Chemical Engineering, Tiangong University, Tianjin 300387, China

<sup>3</sup> Department of Chemical & Biomolecular Engineering, National University of Singapore, 117585, Singapore

<sup>4</sup> Research Centre for Sustainable Technologies, Faculty of Engineering, Computing and Science, Swinburne University of Technology, Jalan Simpang Tiga, 93350, Kuching, Sarawak, Malaysia

\*Corresponding authors: jian.song@sdut.edu.cn (J. Song);

Shaomin.Liu@curtin.edu.au

Tel: +86-533-2781681;

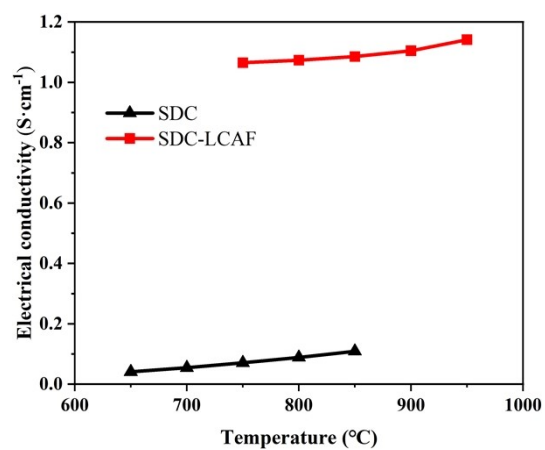

Fig. S1 Electrical conductivity of SDC and SDC-LCAF membrane materials in air atmosphere as a function of temperature.

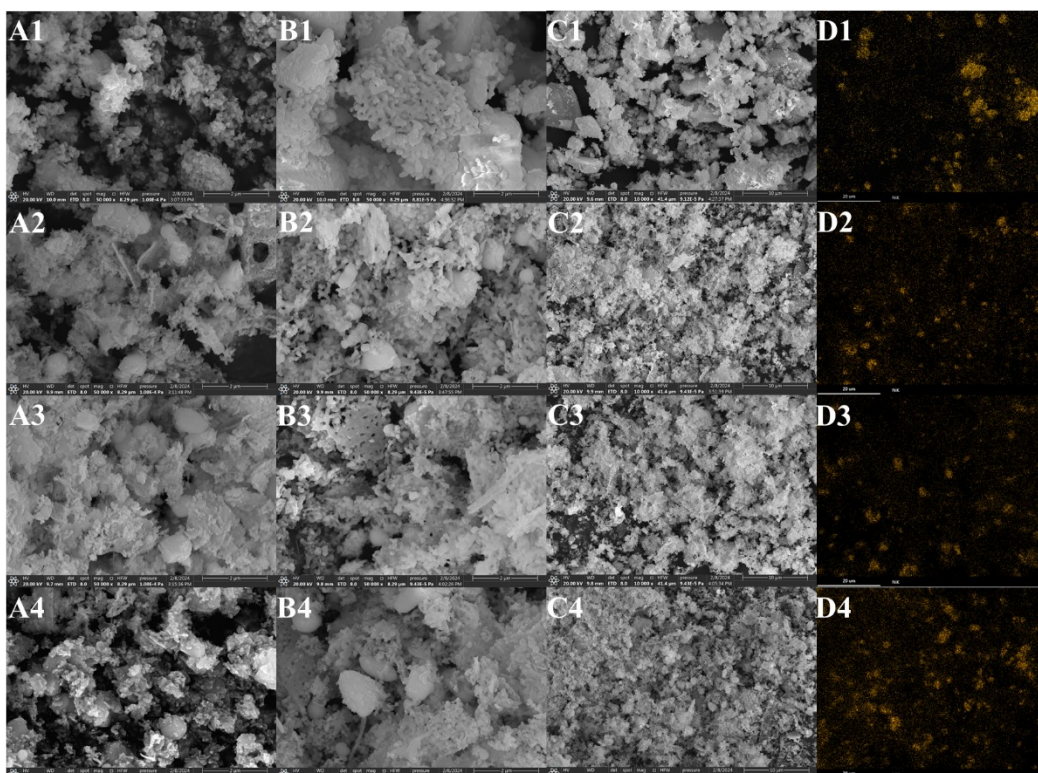

Fig. S2 (A-C) Morphology of NiO/SDC-LCAF catalyst with different Ni content before and after hydrogen reduction, (D) Ni distribution patterns of Fig. C (A, before reduction; B and C after reduction. 1, 10 wt.%; 2, 20 wt.%; 3, 30 wt.%; 4, 40 wt.%).

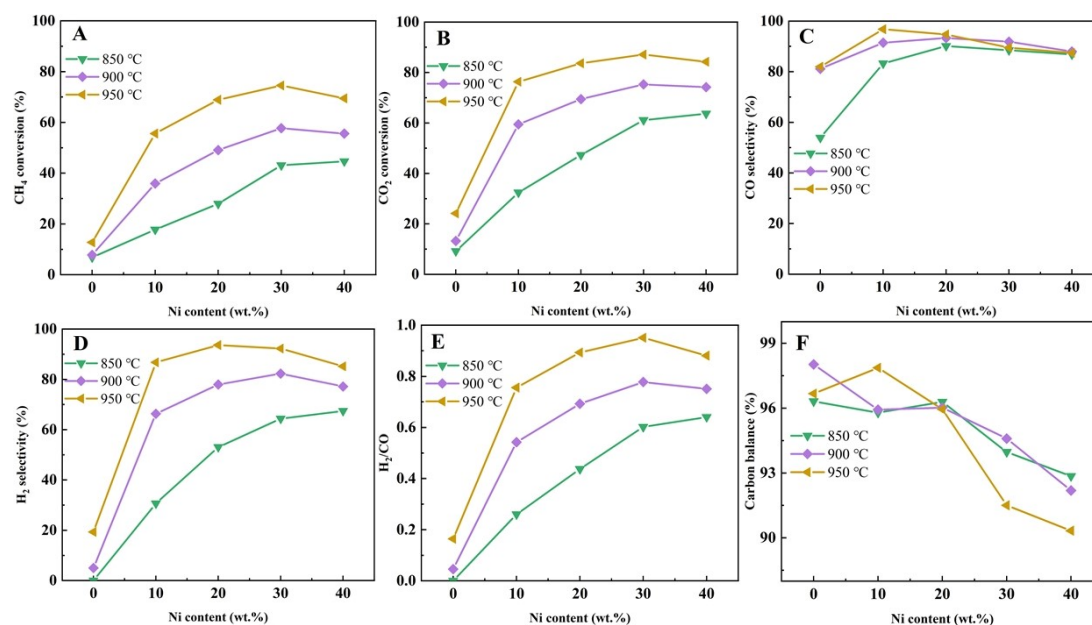

Fig. S3 DRM catalytic performance of catalysts with different Ni contents: (A) CH<sub>4</sub> and (B) CO<sub>2</sub> conversion, (C) CO and (D) H<sub>2</sub> selectivity, (E) H<sub>2</sub>/CO molar ratio, and (F) carbon balance (feed gas was 50 mL min<sup>-1</sup> CH<sub>4</sub> and 50 mL min<sup>-1</sup> CO<sub>2</sub>).

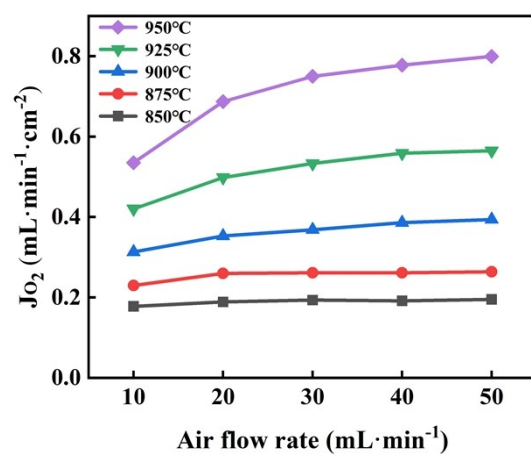

Fig. S4 Oxygen permeation fluxes of SDC-LCAF hollow fiber membrane at different air feed flow rates (900 °C, He sweep flow rate was 100  $\text{mL} \cdot \text{min}^{-1}$ ).

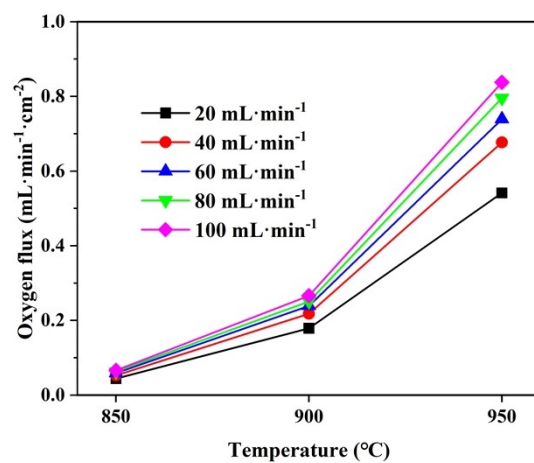

Fig. S5 Effect of He sweep flow rate on oxygen flux of LCAF-SDC hollow fiber membrane as a function of temperature (Air feed flow rate was 100 mL min<sup>-1</sup>).

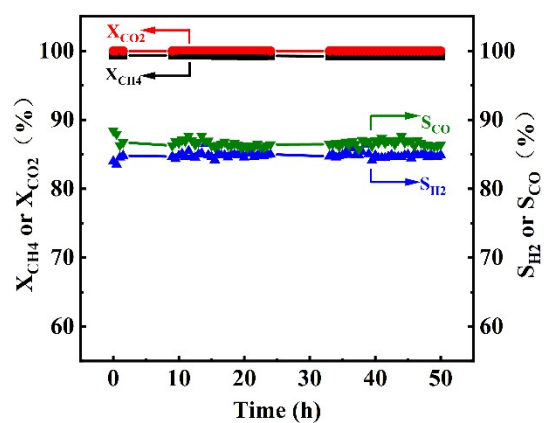

Fig. S6 DRM stability of SDC-LCAF HFM reactor at 900 °C (flow rate of CH<sub>4</sub>-CO<sub>2</sub>-He was 10-10-20 mL min<sup>-1</sup>, respectively).

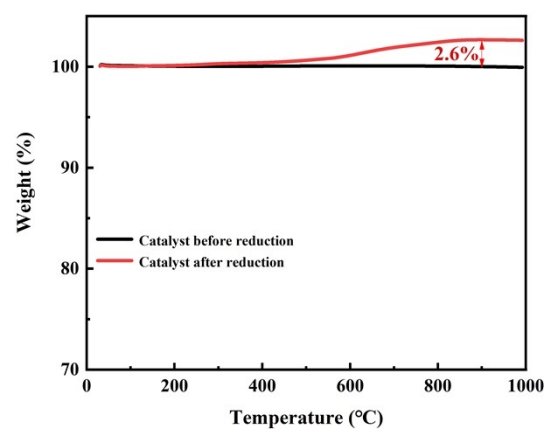

Fig. S7 TGA curves of catalysts before and after reduction.

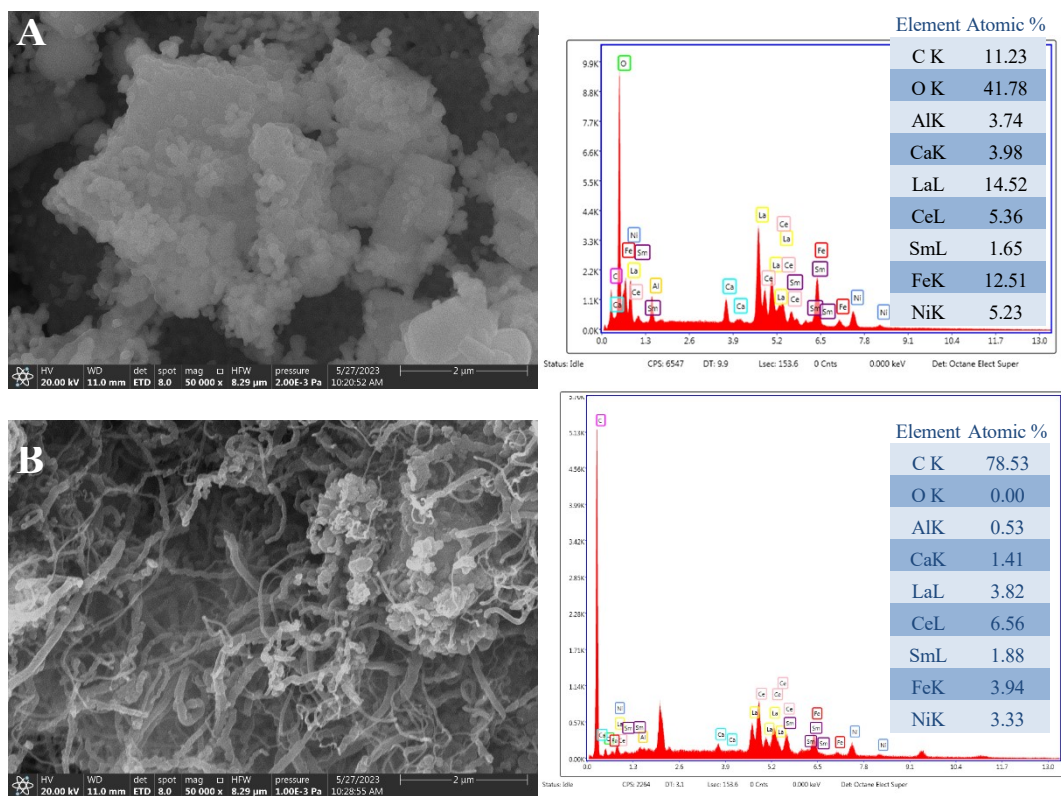

Fig. S8 EDS mapping of spent catalysts after (A) OCRM and (B) DRM.
